# Supplementary material for: Synthesis, structure and coordination properties of novel bifunctional carboxylic derivatives of 1,3-alternate tetrathiacalix[4]arene
Source: Royal Society of Chemistry journal article supplement (doi:10.1039/c6ra01730d), 2016-01-01
Supplement: c6ra01730d1.pdf [file c6ra01730d1.pdf]

## Electronic Supplementary Information

### Synthesis, structure and coordinating properties of novel bifunctional carboxylic derivatives of *1,3-alternate* tetrathiacalix[4]arene

Sergey N. Podyachev<sup>a,\*</sup>, Gulnaz Sh. Gimazetdinova<sup>b</sup>, Aidar T. Gubaidullin<sup>a</sup>, Victor V. Syakaev<sup>a</sup>, Svetlana N. Sudakova<sup>a</sup>, Bulat M. Gabidullin<sup>a</sup>, Vladimir T. Ivanov<sup>a</sup>, Edward L. Gogolashvili<sup>a</sup>, and Alexander I. Konovalov<sup>a</sup>

<sup>a</sup> *A. E. Arbutov Institute of Organic and Physical Chemistry, Kazan Scientific Center of Russian Academy of Sciences, Arbuzov str., 8, 420088, Kazan, Russia*

<sup>b</sup> *Kazan National Research Technological University, K. Marks str., 68, 420015, Kazan, Russia*

#### Content

|                                                                                           |    |
|-------------------------------------------------------------------------------------------|----|
| 1. Copies of IR spectra of compounds <b>3a</b> and <b>3b</b>                              | 3  |
| 2. Copies of <sup>1</sup> H NMR, <sup>13</sup> C NMR and IR spectra of compound <b>4a</b> | 5  |
| 3. Copies of <sup>1</sup> H NMR, <sup>13</sup> C NMR and IR spectra of compound <b>4b</b> | 7  |
| 4. Copies of <sup>1</sup> H NMR, <sup>13</sup> C NMR and IR spectra of compounds <b>5</b> | 9  |
| 5. Copies of <sup>1</sup> H NMR, <sup>13</sup> C NMR and IR spectra of compound <b>6</b>  | 11 |
| 6. Copies of <sup>1</sup> H NMR, <sup>13</sup> C NMR and IR spectra of compound <b>7</b>  | 13 |

---

\* Corresponding author. Tel.: +7-843-273-4573; fax: +7-843-273-1872; e-mail: spodyachev@iopc.ru (S.N. Podyachev)

# 1. Copies of IR spectra of compounds 3a and 3b

a)

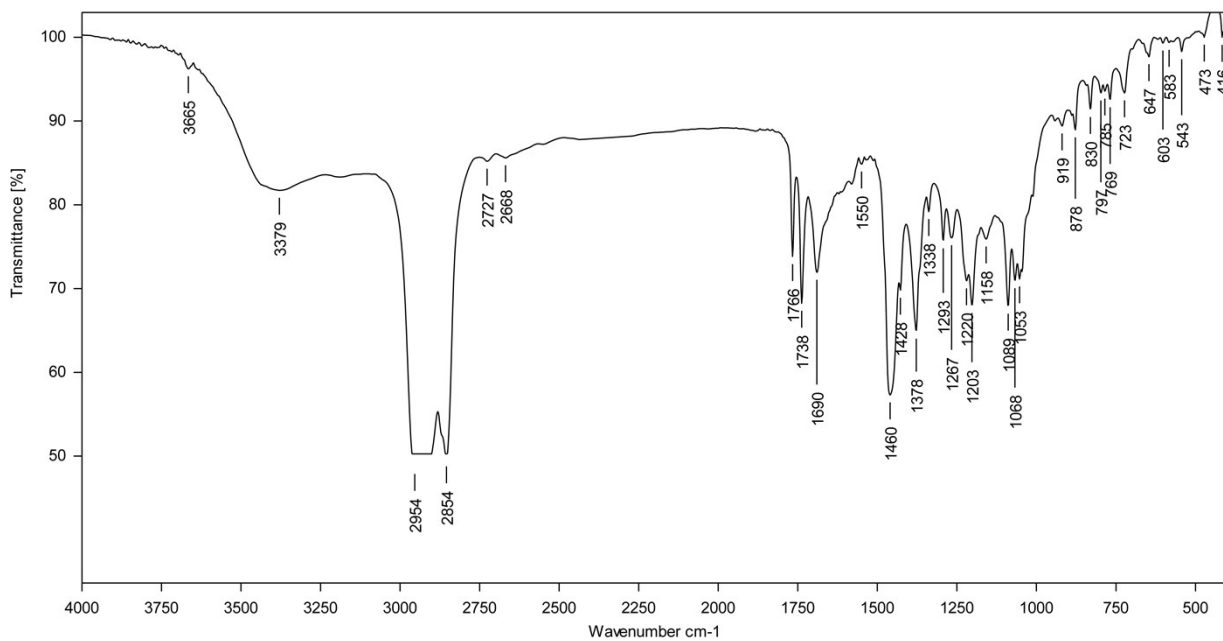

b)

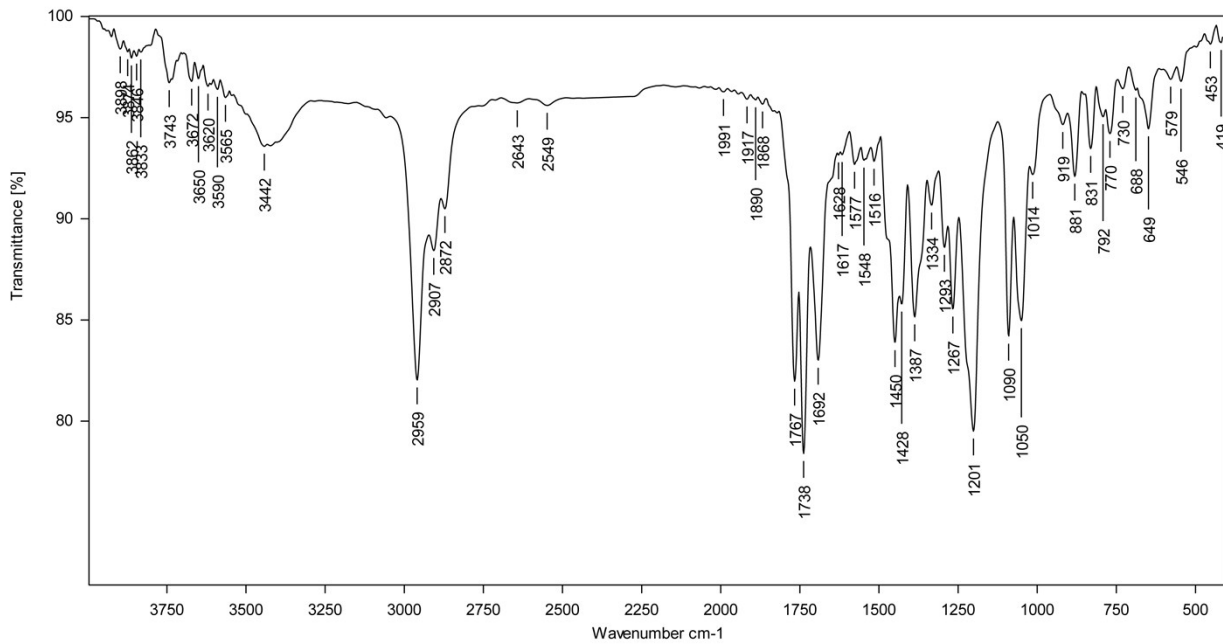

Figure 1. IR-spectrum of 3a: a) in nujol; b) in KBr pellet

a)

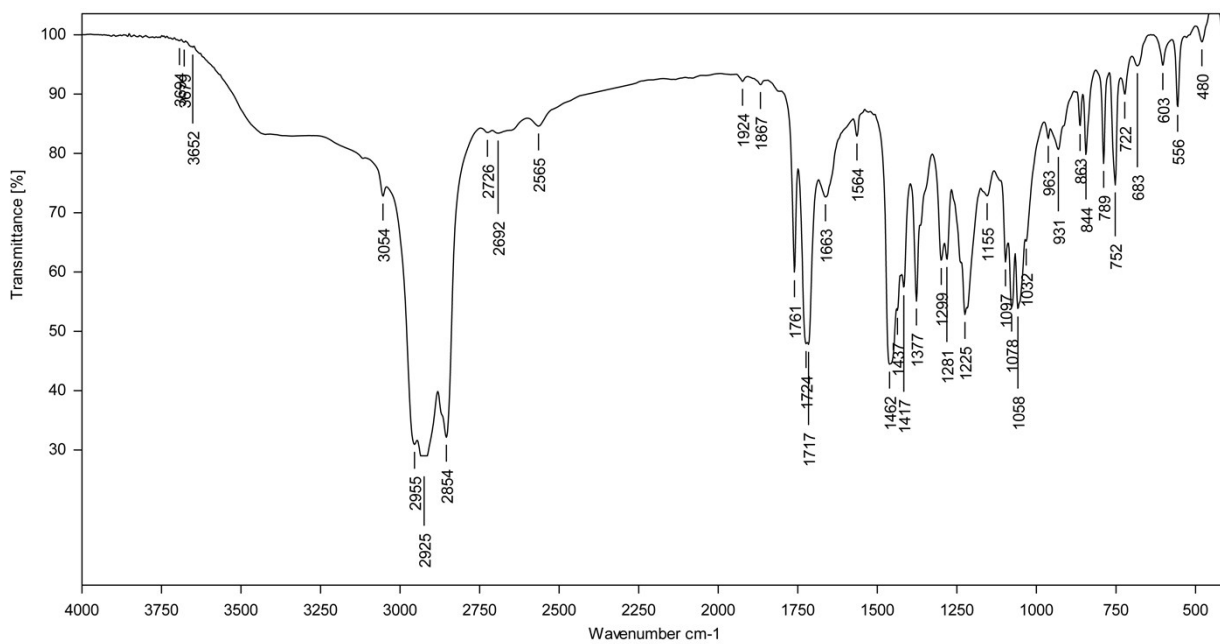

b)

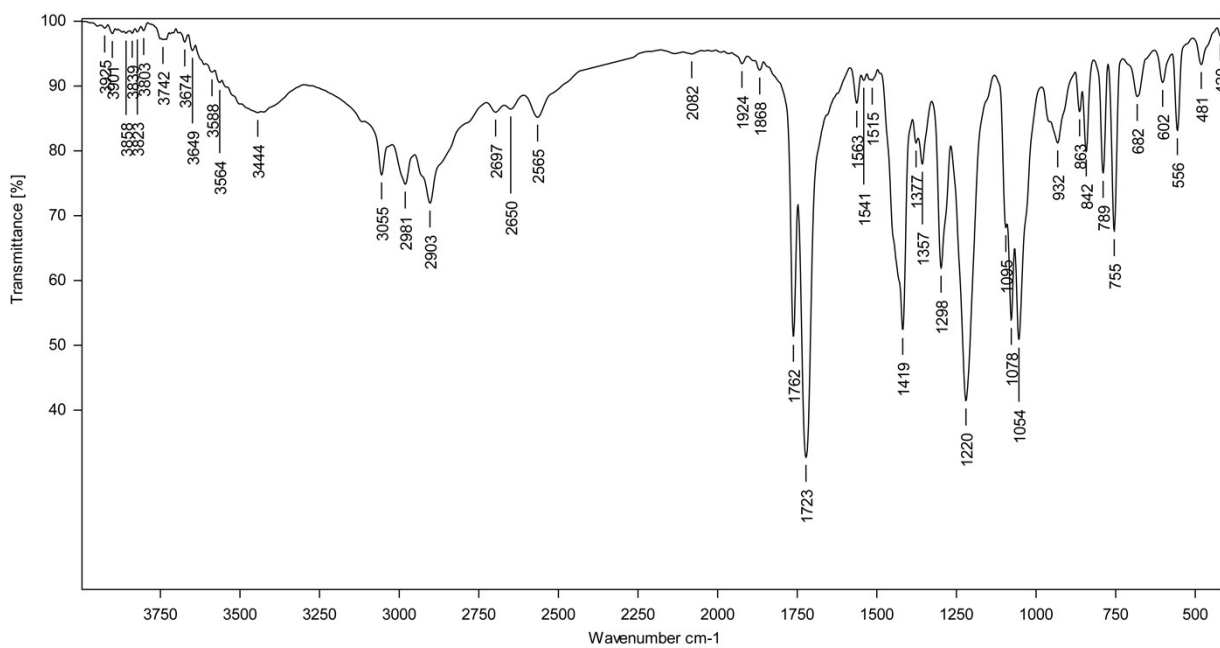

**Figure 2.** IR-spectrum of **3b**: a) in nujol; b) in KBr pellet

## 2. Copies of $^1\text{H}$ NMR, $^{13}\text{C}$ NMR and IR spectra of compound 4a

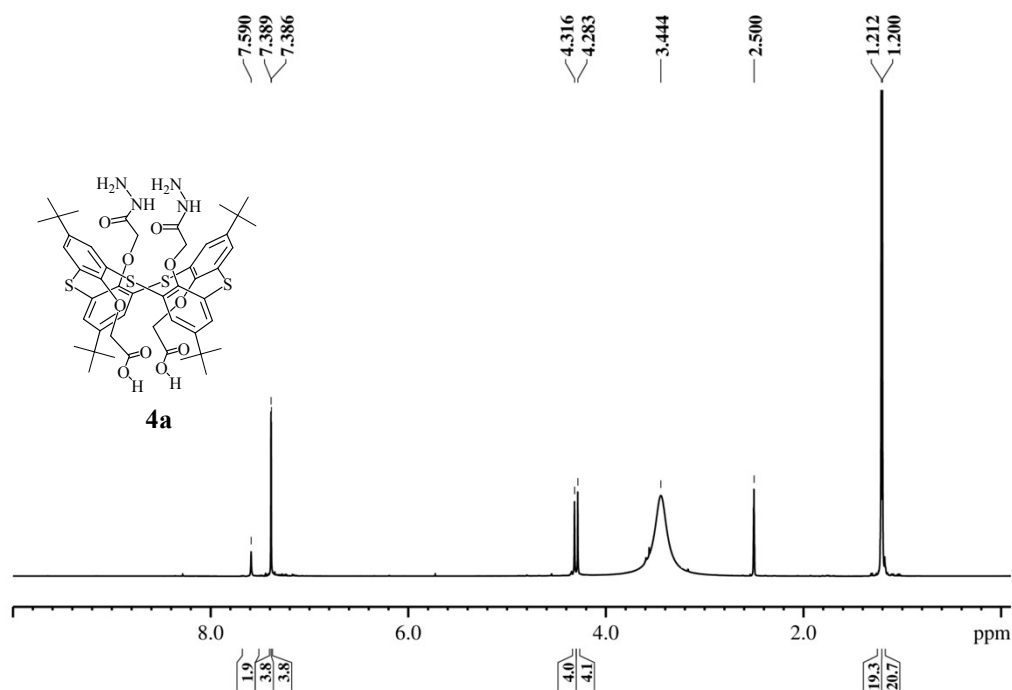

**Figure 3.**  $^1\text{H}$  NMR spectrum (DMSO- $d_6$ ) of **4a**.

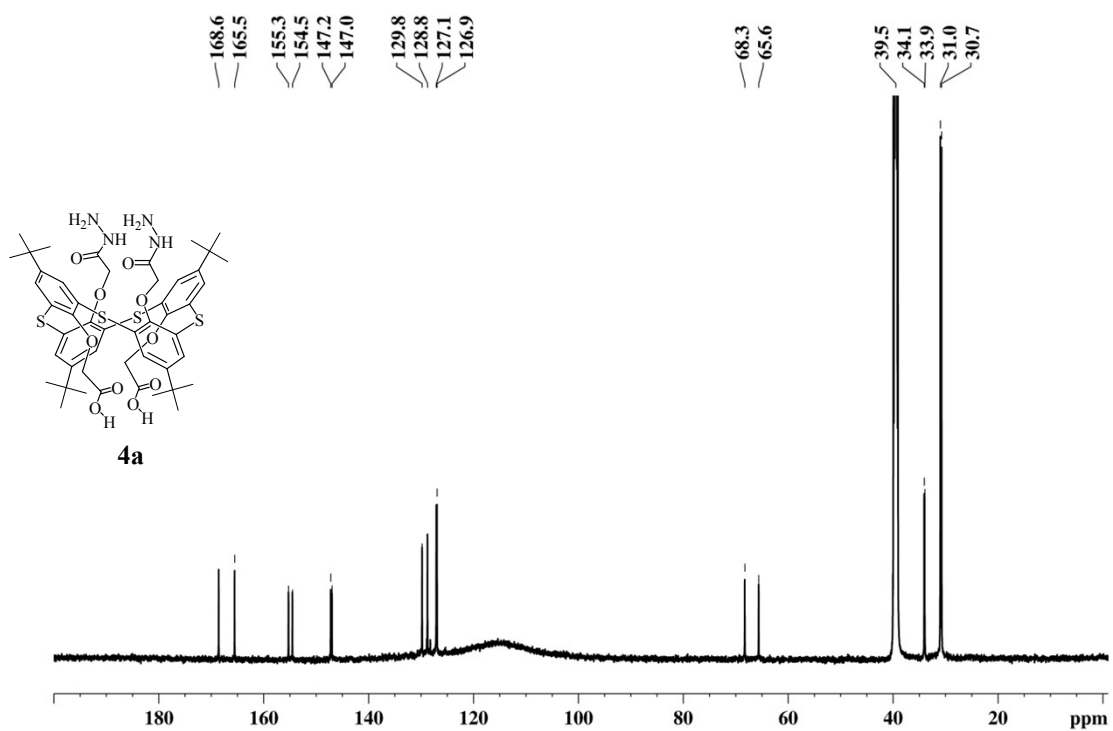

**Figure 4.**  $^{13}\text{C}$  NMR spectrum (DMSO- $d_6$ ) of **4a**.

a)

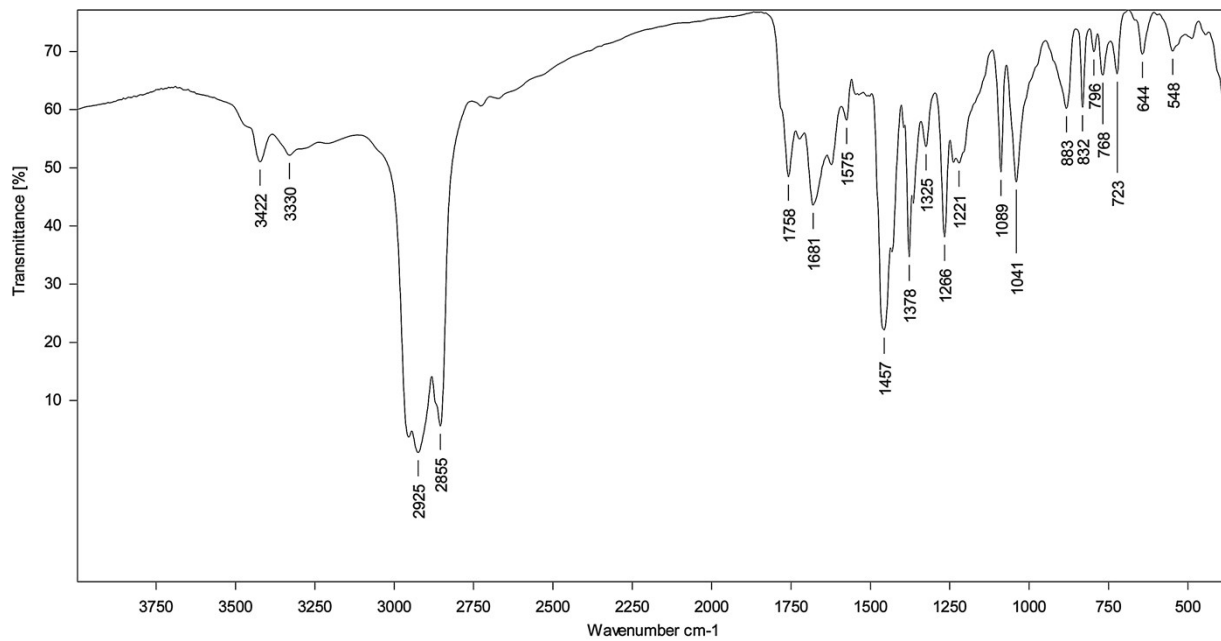

b)

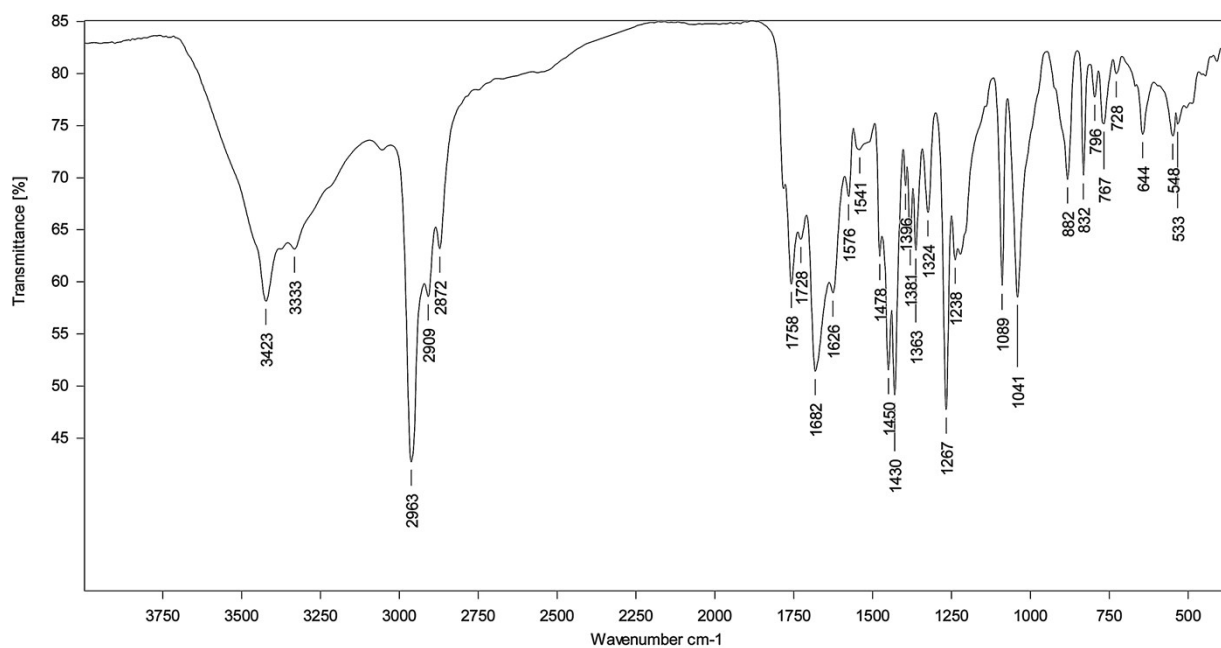

**Figure 5.** IR-spectrum of **4a**: a) in nujol; b) in KBr pellet

### 3. Copies of $^1\text{H}$ NMR, $^{13}\text{C}$ NMR and IR spectra of compound **4b**

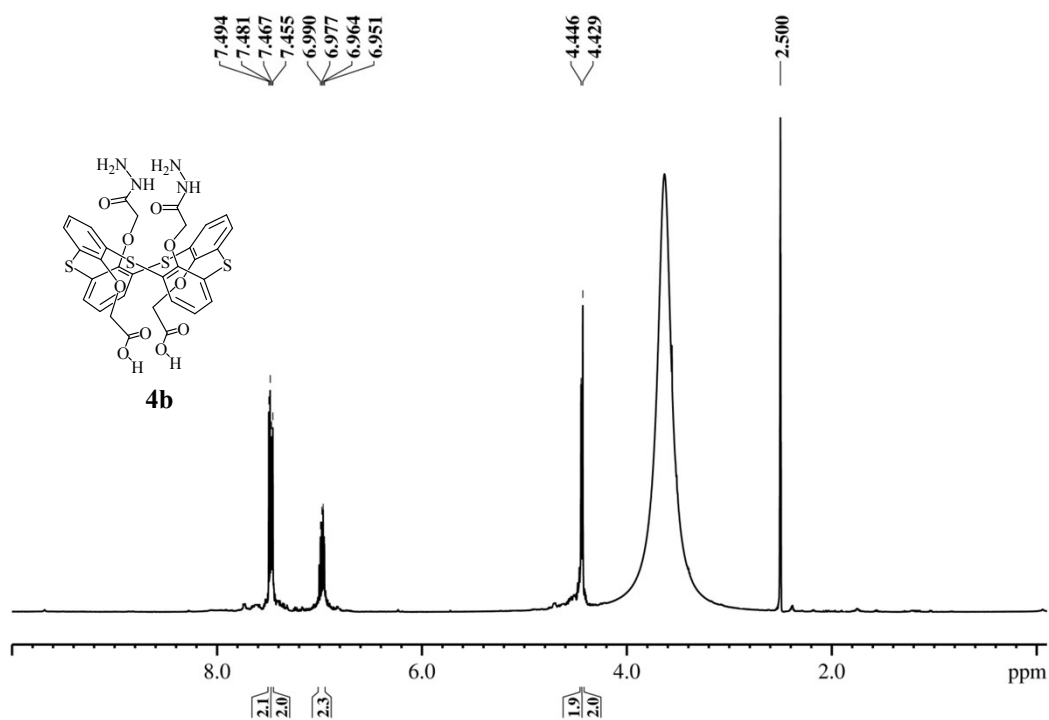

Figure 6.  $^1\text{H}$  NMR spectrum ( $\text{DMSO-}d_6$ ) of **4b**.

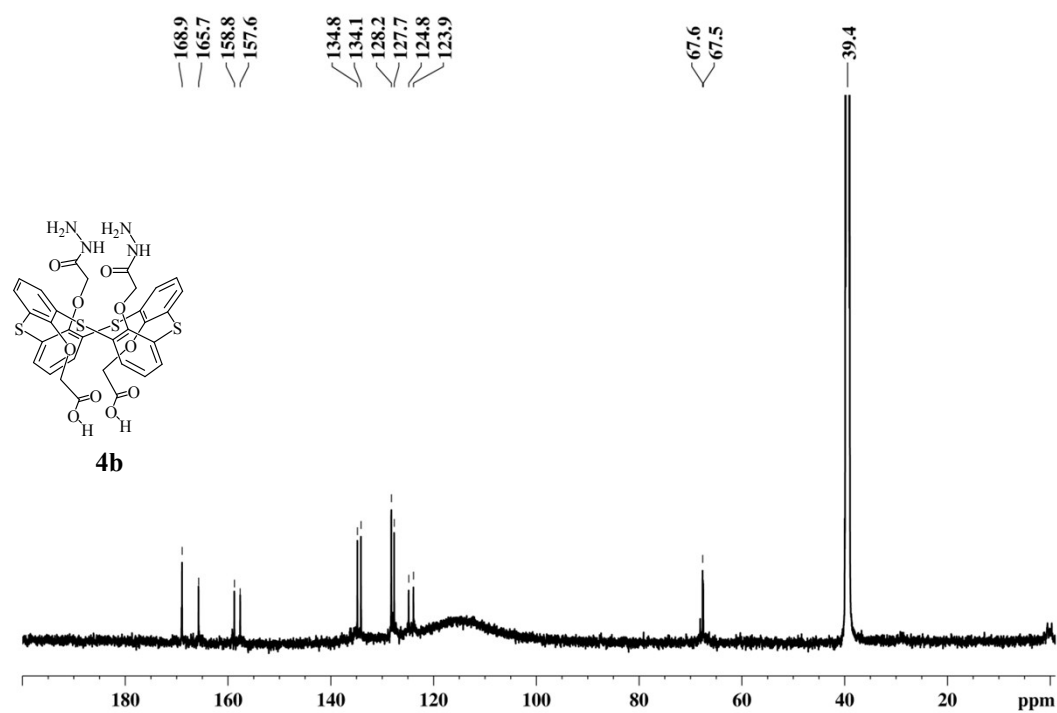

Figure 7.  $^{13}\text{C}$  NMR spectrum ( $\text{DMSO-}d_6$ ) of **4b**.

a)

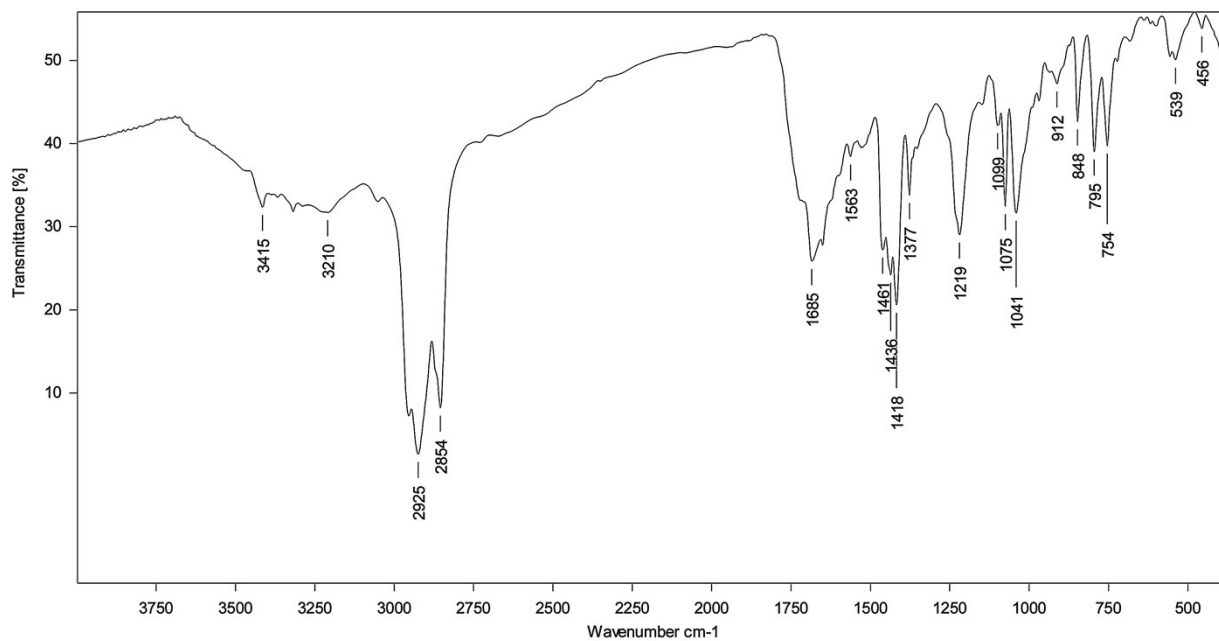

b)

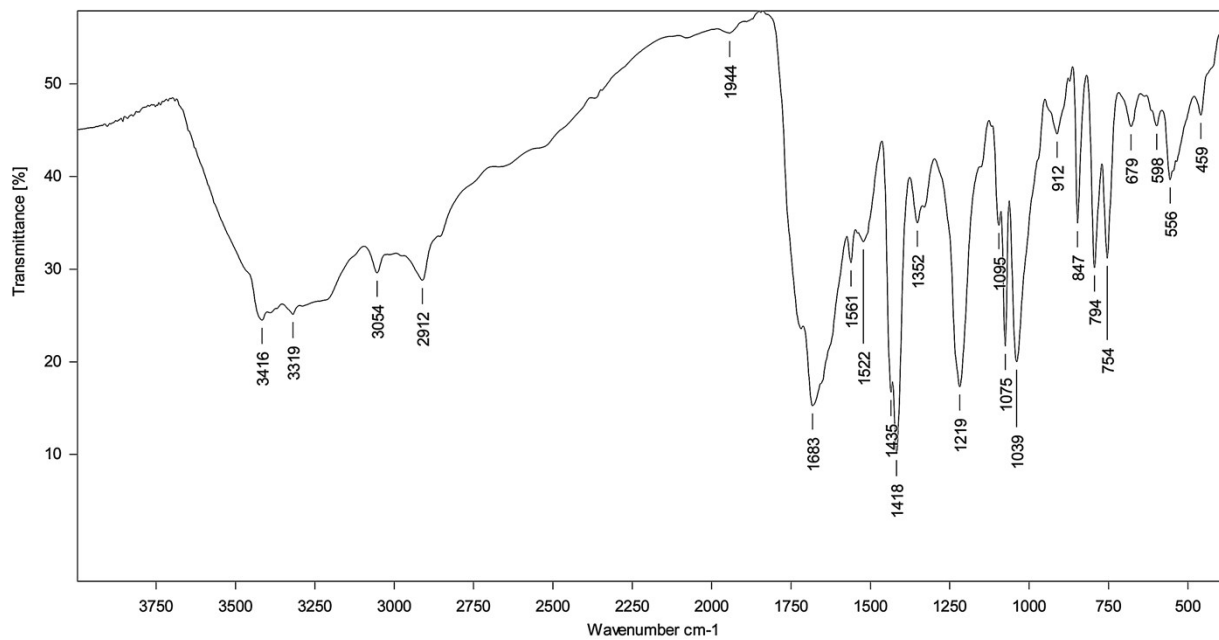

**Figure 8.** IR-spectrum of **4b**: a) in nujol; b) in KBr pellet

## 5. Copies of $^1\text{H}$ NMR, $^{13}\text{C}$ NMR and IR spectra of compound 5

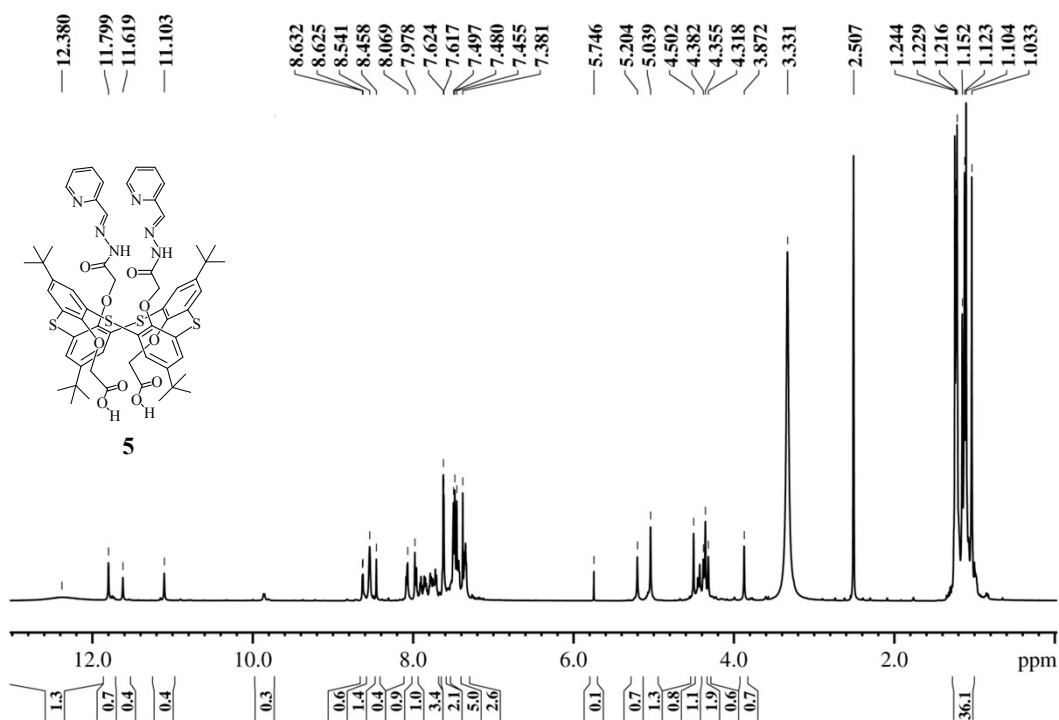

**Figure 9.**  $^1\text{H}$  NMR spectrum (DMSO- $d_6$ ) of 5.

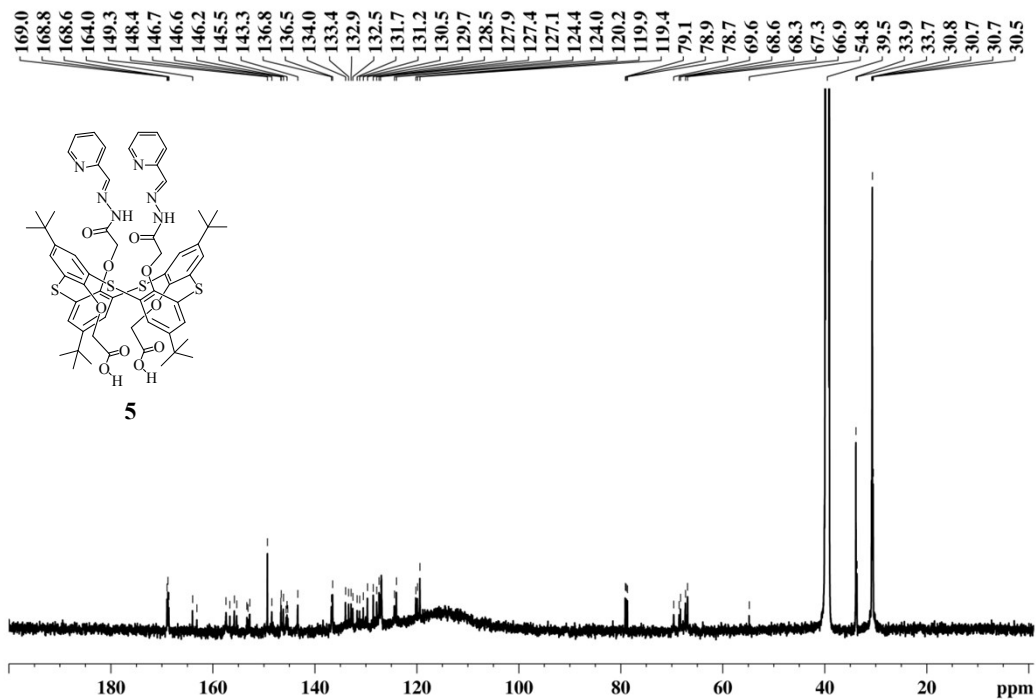

**Figure 10.**  $^{13}\text{C}$  NMR spectrum (DMSO- $d_6$ ) of 5.



a)

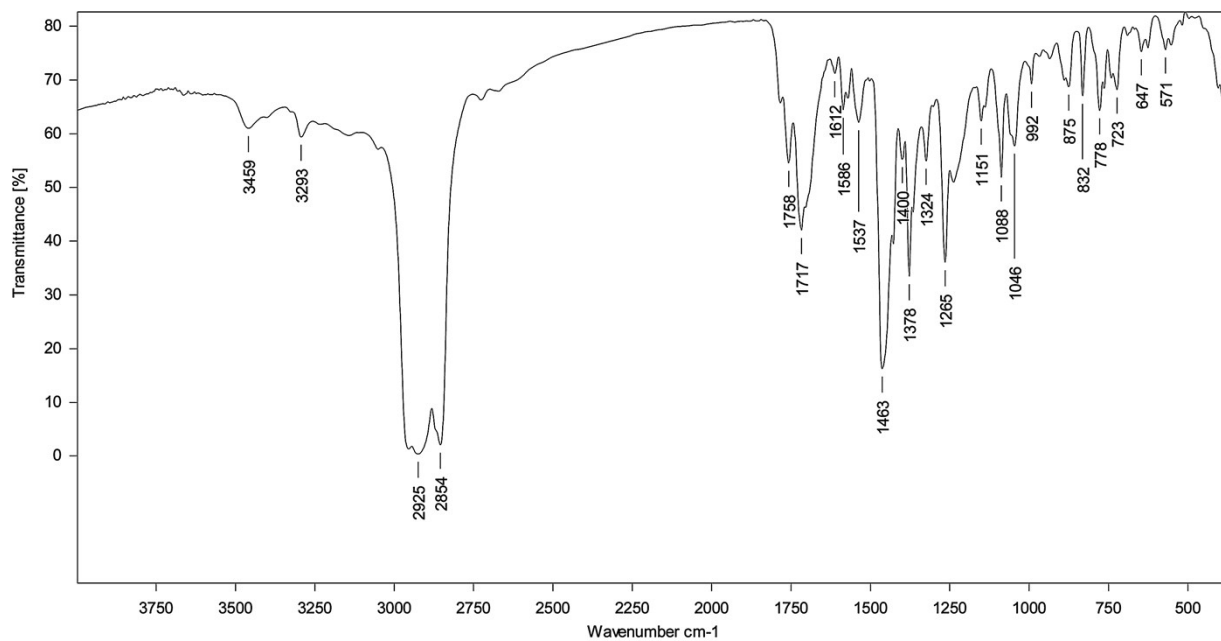

b)

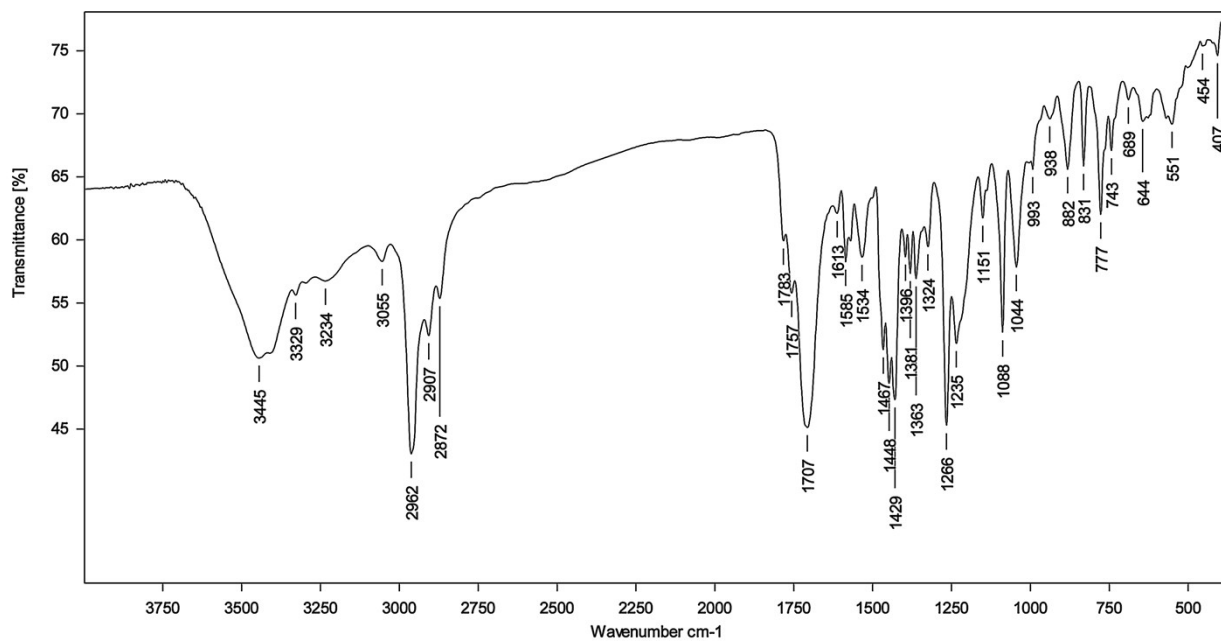

**Figure 11.** IR-spectrum of **5**: a) in nujol; b) in KBr pellet

## 6. Copies of $^1\text{H}$ NMR, $^{13}\text{C}$ NMR and IR spectra of compound 6

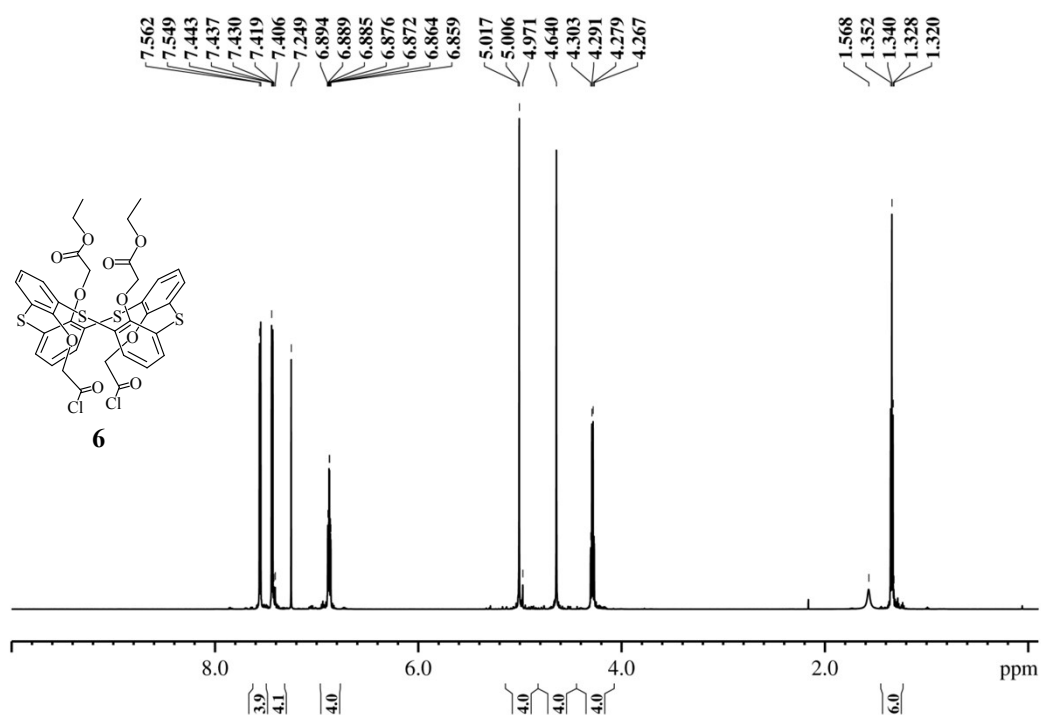

Figure 12.  $^1\text{H}$  NMR spectrum (DMSO- $d_6$ ) of 6.

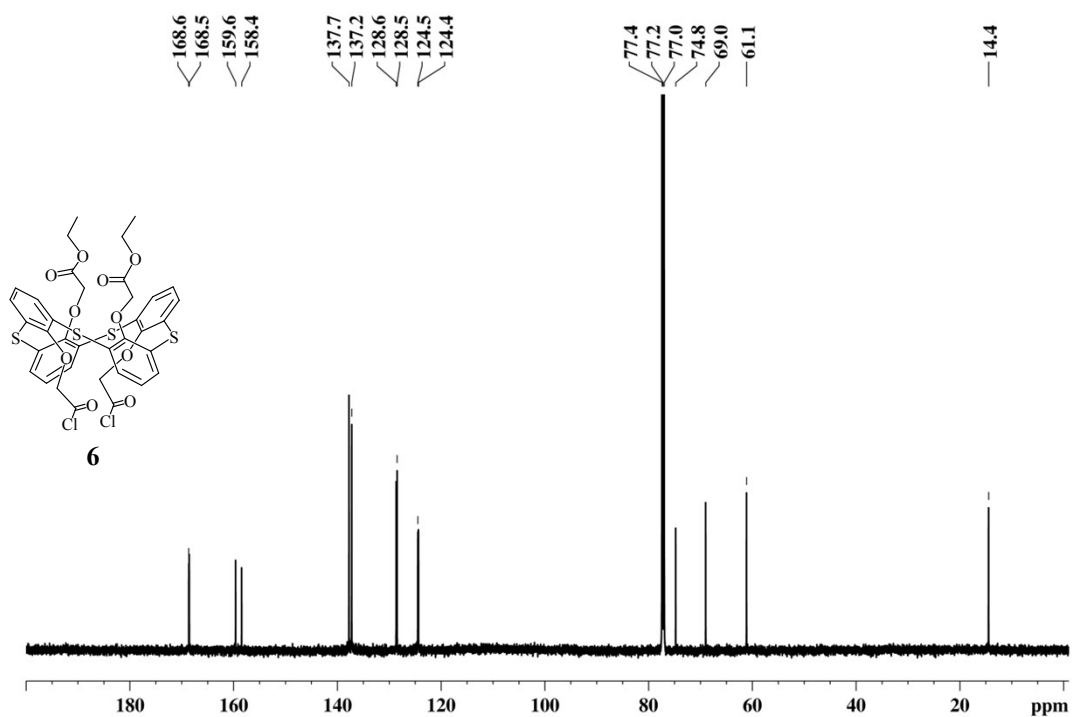

Figure 13.  $^{13}\text{C}$  NMR spectrum (DMSO- $d_6$ ) of 6.

a)

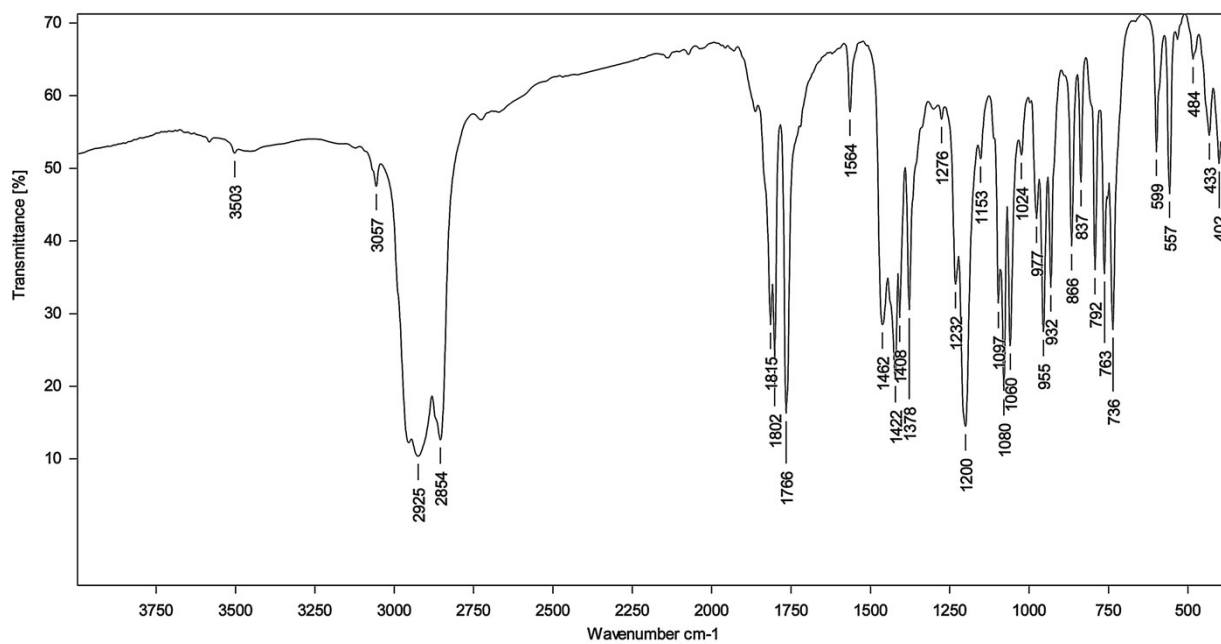

b)

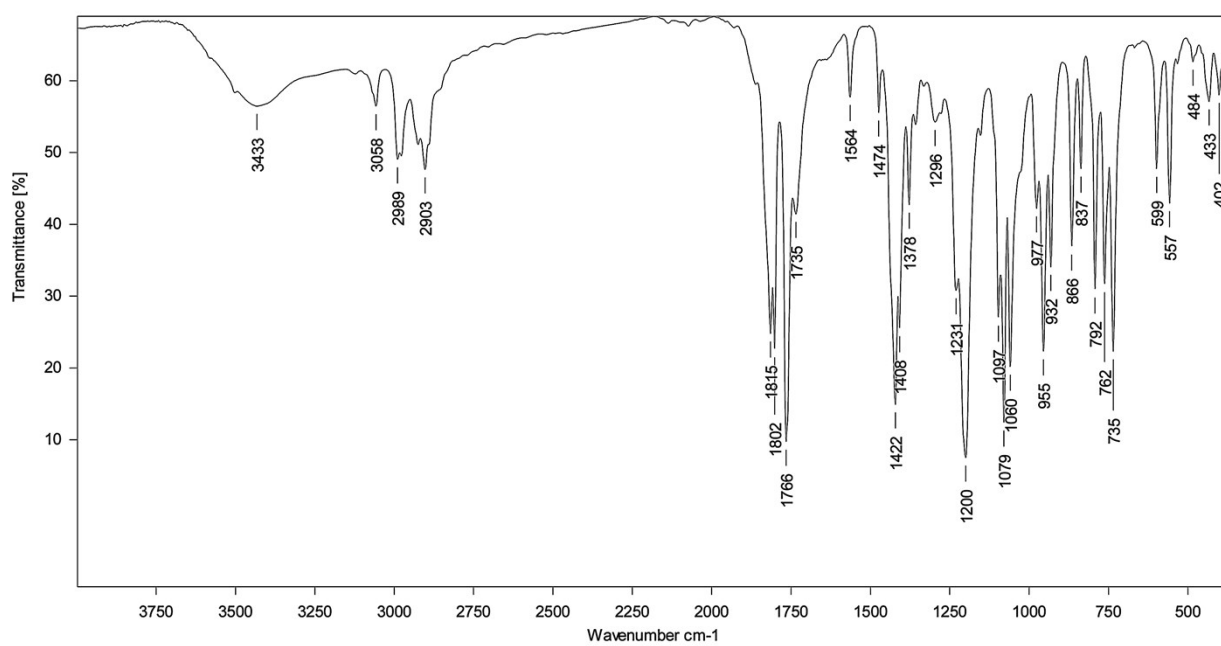

**Figure 14.** IR-spectrum of **6**: a) in nujol; b) in KBr pellet

## 7. Copies of $^1\text{H}$ NMR, $^{13}\text{C}$ NMR and IR spectra of compound 7

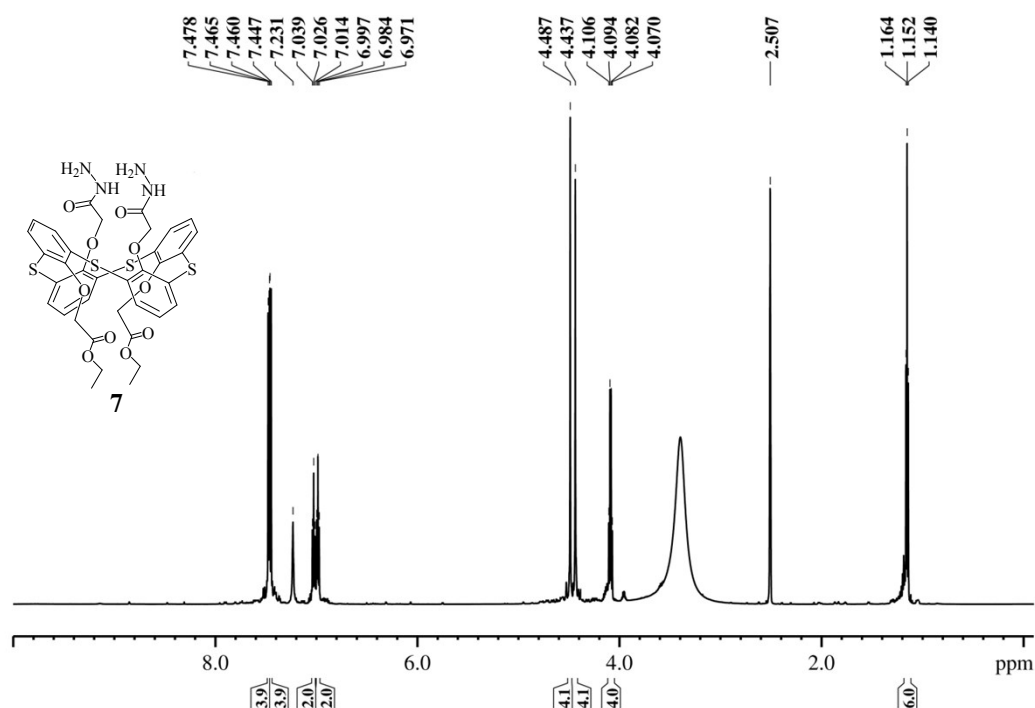

Figure 15.  $^1\text{H}$  NMR spectrum (DMSO- $d_6$ ) of 7.

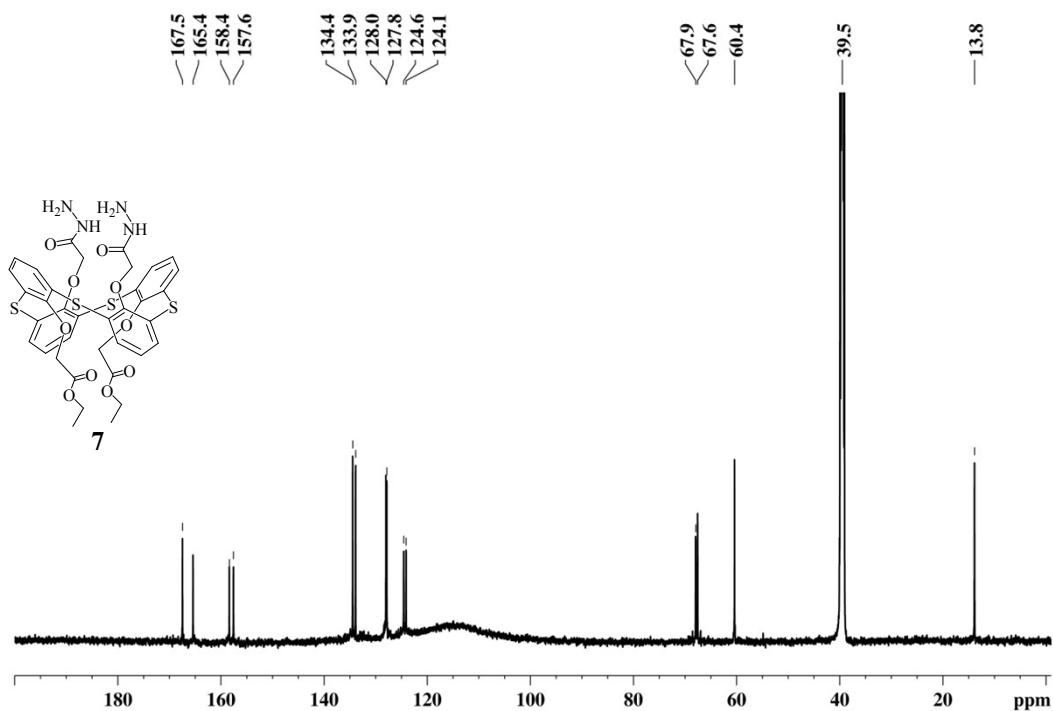

Figure 16.  $^{13}\text{C}$  NMR spectrum (DMSO- $d_6$ ) of 7.

a)

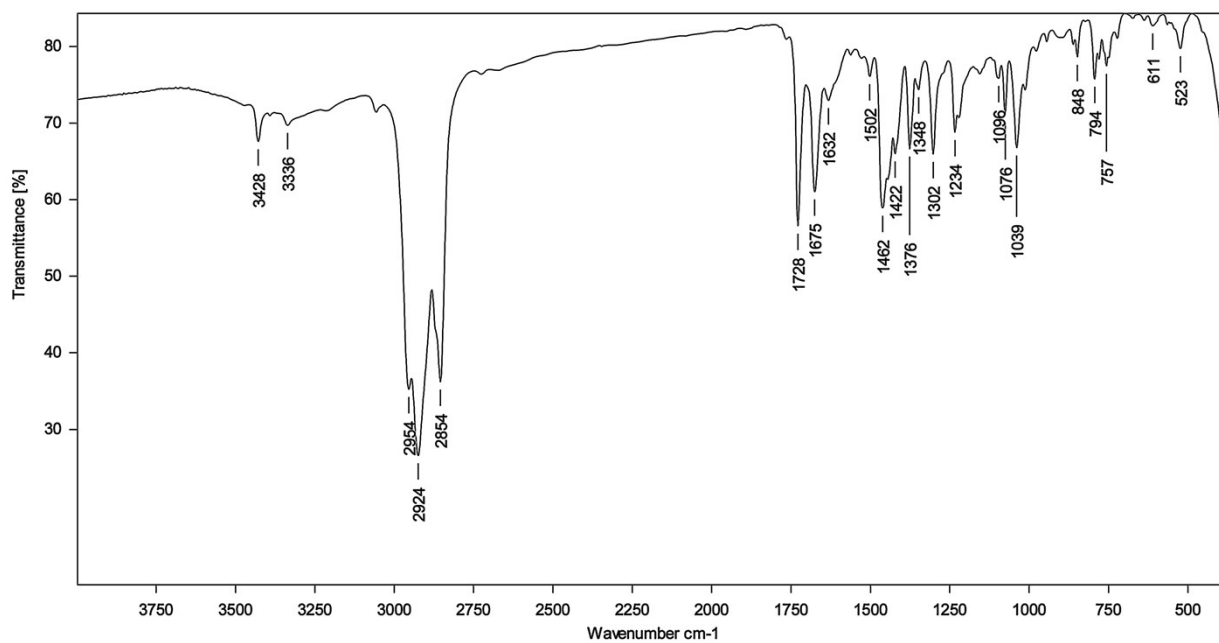

b)

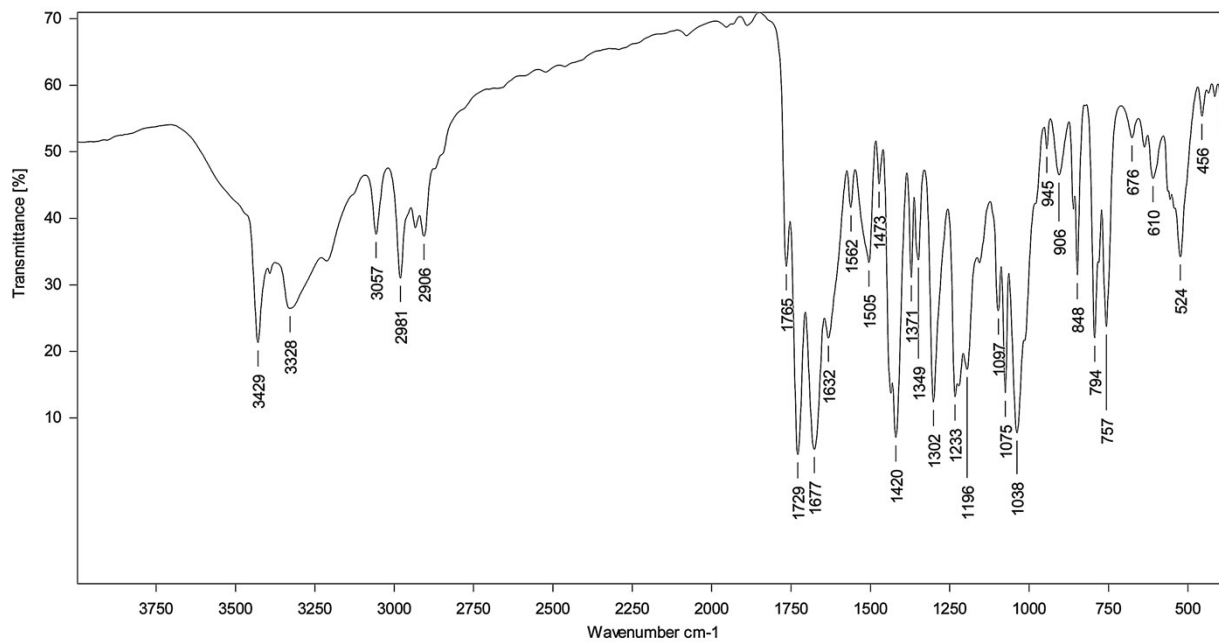

**Figure 17.** IR-spectrum of 7: a) in nujol; b) in KBr pellet
